# Supplementary material for: Inhibition of Autophagy Increases Cell Death in HeLa Cells through Usnic Acid Isolated from Lichens
Source: MDPI journal article supplement (doi:10.3390/plants12030519), 2023-01-23
Supplement: s1 [file s1]

# **Inhibition of Autophagy Increases Cell Death in HeLa Cells through Usnic Acid Isolated from Lichens**

**Madhuree Kumari <sup>1</sup>, Siya Kamat <sup>1</sup>, Sandeep Kumar Singh <sup>2</sup>, Ajay Kumar <sup>3,\*</sup> and C. Jayabaskaran <sup>1,\*</sup>**

<sup>1</sup> Department of Biochemistry, Indian Institute of Science, Bangalore 560012, India

<sup>2</sup> Division of Microbiology, Indian Agricultural Research Institute, Pusa, New Delhi 110012, India

<sup>3</sup> Centre of Advanced study in Botany, Banaras Hindu University, Varanasi 221005, India

\* Correspondence: [ajaykumar\\_bhu@yahoo.com](mailto:ajaykumar_bhu@yahoo.com) (A.K.); [cjb@iisc.ac.in](mailto:cjb@iisc.ac.in) (C.J.); Tel.: +91-80-2293-2482; Fax: +91-80-2360-0814 (C.J.)

**A**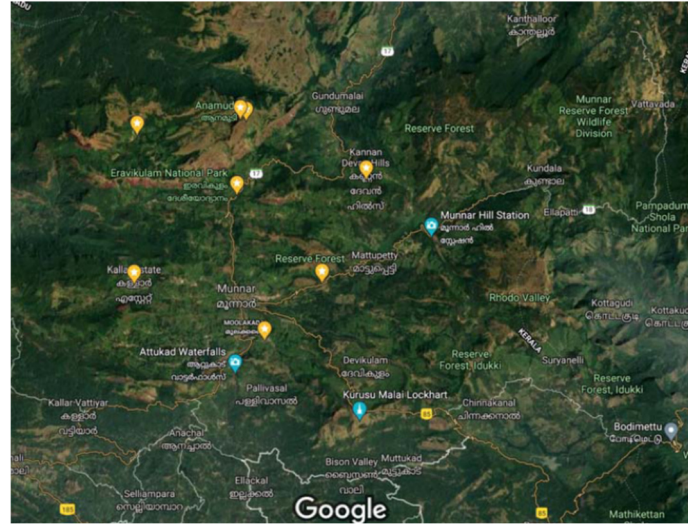**B**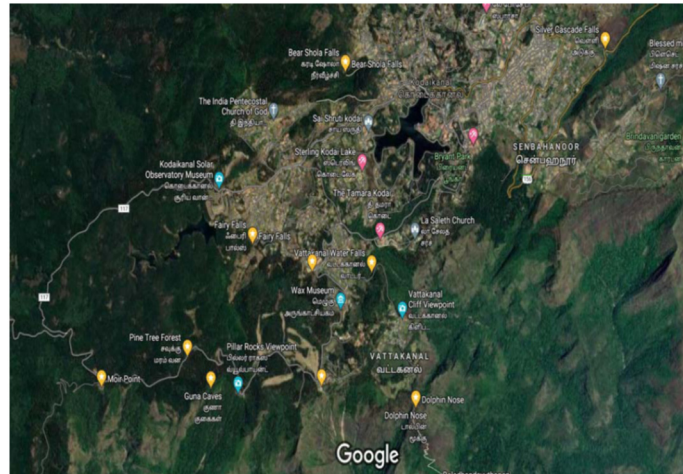

Figure S1: Sampling locations of lichens in Munnar and Kodaikanal, India

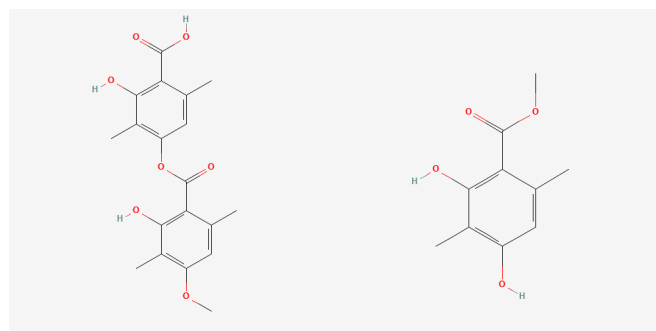

Barbatic acid  $C_{19}H_{20}O_7$  Atraric acid  $C_{10}H_{12}O_4$

Figure S2: Structure of barbatic acid and atraric acid

Table S1: Diversity and distribution pattern of lichens isolated from the western Ghats, India

| S. no. | Lichen name                | Location                            | Description                     | Spot test                       |
|--------|----------------------------|-------------------------------------|---------------------------------|---------------------------------|
| 1.     | <i>Parmelia sulcata</i>    | Bear Shola falls, Kodaikanal        | Growing on the bark of the tree | KC-P+yellow                     |
| 2.     | <i>Usnea cornuta</i>       | Bear Shola falls, Kodaikanal        | Growing on the bark of the tree | KC+pale yellowP+orange yellow e |
| 3.     | <i>Parmelia andinum</i>    | Guna caves, Kodaikanal              | Growing on the bark of the tree | KC-P+orang                      |
| 4.     | <i>Parmotrema perlatum</i> | Dolphin nose, Kodaikana             | Growing on the bark of the tree | KC-P-                           |
| 5.     | <i>Usnea sp.</i>           | Dolphin nose, Kodaikana             | Growing on the bark of the tree | KC+pale yellowP+orange          |
| 6.     | <i>Collema flaccidum</i>   | Pine tree/Moir point, Kodaikanal    | Growing on the bark of the tree | KC-P-                           |
| 7.     | <i>Hypogymnia physodes</i> | Pine tree/Moir point, Kodaikanal    | Growing on the bark of the tree | KC-P+yellow                     |
| 8.     | <i>Cladonia macilenta</i>  | Dolphin nose, Kodaikana, Kodaikanal | Growing on the bark of the tree | KC+P+yellow                     |
| 9.     | <i>Heterodermia indica</i> | Bear Shola falls, Kodaikanal        | Growing on the rocks            | KC-P+yellow                     |

|     |                                |                                           |                                         |              |
|-----|--------------------------------|-------------------------------------------|-----------------------------------------|--------------|
| 10. | <i>Cladonia macilenta</i>      | Anamudi,<br>Munnar                        | Growing on<br>the bark of<br>the tree   | KC+P+ yellow |
| 11. | <i>Parmelia sulcata</i>        | Kannan<br>devan Hills                     | Growing on<br>the tree in<br>tea garden | KC-P+yellow  |
| 12. | <i>Parmelia sp.</i>            | Kannan<br>devan Hills,<br>Munnar          | Growing on<br>the tree in<br>tea garden | KC-P+yellow  |
| 13. | <i>Collema flaccidum</i>       | Kallar estate,<br>Munnar                  | Growing on<br>the tree in<br>tea garden | KC-P-        |
| 14. | <i>Leptogium sp.</i>           | Eravikulam<br>National<br>Park,<br>Munnar | Growing on<br>the tree in<br>tea garden | KC-P-        |
| 15. | <i>Hypogymnia<br/>physodes</i> | Eravikulam<br>National<br>Park,<br>Munnar | Growing on<br>the bark of<br>the tree   | KC-P+yellow  |
| 16. | <i>Physcia sp.</i>             | Anamudi,<br>Munnar                        | Rocks                                   | KC-P-        |

**Table S2: Zeta potential of usnic acid (UA) treated HeLa cells in the presence and absence of chloroquine (+/-CQ) after 24h of treatment**

| UA (μM)  | Zeta potential (mV) |
|----------|---------------------|
| Control  | -19.08±0.81         |
| 25       | -20.01±1.08         |
| 25+CQ    | -23.15±0.35         |
| 50       | -23.17±1.33         |
| 50+CQ    | -29.78±3            |
| C+CQ     | -20.45±0.66         |
| UA (1mM) | 8.05±0.98           |
| CQ       | -6.02±1.2           |
